1 *Original research article*

2 **Title:** Prevalence of and risk factors for Tuberculosis among health  
3 care workers in Yogyakarta, Indonesia

4

5 **Running head:** TB among HCWs in Yogyakarta

6 **Authors:** Ms Stephanie Main<sup>1,2</sup>, Dr Rina Triasih<sup>3,4</sup>, Dr Jane Greig<sup>1</sup>, Mr Arif Hidayat<sup>3</sup>, Dr  
7 Immanuel Billy Brilliandi<sup>3</sup>, Ms Syarifah Khodijah<sup>4</sup>, Mr Geoff Chan<sup>1</sup>, Ms Nova Wilks<sup>1</sup>, Ms Amy  
8 Elizabeth Parry<sup>2</sup>, Dr Betty Nababan<sup>3</sup>, Dr Philipp du Cros<sup>1\*</sup> & Dr Bintari Dwihardiani<sup>3</sup>

9

10 **Affiliation(s):**

11 *<sup>1</sup>Tuberculosis Elimination and Implementation Science Working Group, Burnet Institute,  
12 Melbourne, Australia*

13

14 *<sup>2</sup>National Centre for Epidemiology and Population Health, Australian National University,  
15 Canberra, Australia*

16

17 *<sup>3</sup>Centre of Tropical Medicine, Faculty of Medicine, Public Health and Nursing, Universitas  
18 Gadjah Mada, Yogyakarta, Indonesia*

19

20 *<sup>4</sup>Department of Paediatric, Faculty of Medicine, Public Health and Nursing, Universitas Gadjah  
21 Mada/Dr. Sardjito Hospital, Yogyakarta, Indonesia*

22

23 \*Corresponding Author

24 Email: [Philipp.ducros@burnet.edu.au](mailto:Philipp.ducros@burnet.edu.au)

25

## 26 **ABSTRACT**

### 27 *Background*

28 Healthcare workers (HCWs) are at risk of contracting TB, particularly when in high tuberculosis  
29 (TB) burden settings. Routine surveillance data and evidence are limited on the burden of TB  
30 amongst HCWs in Indonesia.

31

### 32 *Objective*

33 To measure the prevalence of TB infection (TBI) and disease among HCWs in four healthcare  
34 facilities in Yogyakarta and explore risk factors for TBI.

35

### 36 *Methods*

37 A cross-sectional TB screening study targeted all HCWs from four pre-selected facilities (1  
38 hospital, 3 primary care) in Yogyakarta, Indonesia. Voluntary screening included symptom  
39 assessment, Chest X-ray (CXR), Xpert MTB/RIF (if indicated) and tuberculin skin test (TST).  
40 Analyses were descriptive and included multivariable logistic regression.

41

### 42 *Results*

43 Of 792 HCWs, 681 consented (86%) to the screening; 59% (n=401) were female, 62% were  
44 medical staff (n=421), 77% worked in the one participating hospital (n=524), and the median  
45 time working in the health sector was 13 years (IQR: 6-25 years). Nearly half had provided  
46 services for people with TB (46%, n=316) and 9% reported ever having TB (n=60).

47

48 Among participants with presumptive TB (15%, n=99/662), none were diagnosed  
49 microbiologically or clinically with active TB disease. TBI was detected in 25% (95% CI: 22-30;

50 n=112/441) of eligible HCWs with a TST result. A significant association was found between  
51 TB infection and being male (adjusted Odds Ratio (aOR) 2.02 (95%CI: 1.29-3.17)), currently  
52 working in the participating hospital compared to primary care (aOR 3.15 (95%CI: 1.75-5.66)),  
53 and older age (1.05 OR increase per year of life between 19-73 years (95%CI: 1.02-1.06)).

54

#### 55 *Conclusion*

56 This study supports prioritisation of HCWs as a high-risk group for TB infection and disease,  
57 and the need for comprehensive prevention and control programs in Indonesia. Further, it  
58 identifies characteristics of HCWs in Yogyakarta at higher risk of TBI, who could be prioritised  
59 in screening programs if universal coverage of prevention and control measures cannot be  
60 achieved.

## 61 INTRODUCTION

62 Tuberculosis (TB) remains one of the most burdensome and deadliest infectious diseases  
63 worldwide, causing an estimated 10.6 million cases and 1.6 million deaths in 2021 (1). Low-  
64 and middle-income countries (LMICs) bear the brunt of TB's impact, with more than 95% of  
65 deaths occurring in these countries and only eight LMICs accounting for two thirds of the  
66 global caseload (1).

67

68 Healthcare workers (HCWs), are at an increased risk of contracting TB compared to the  
69 general population (2–4). TB infection (TBI) risk is higher in LMICs where exposure to infected  
70 individuals is more likely, and infection prevention and control practices might be insufficient  
71 or inconsistent (5). TB burden estimates among HCWs in LMICs vary considerably. A  
72 systematic review published in 2019 found TBI prevalence by positive tuberculin skin test  
73 (TST) ranged from 14–98% (mean 49%) among HCWs in LMICs, with higher prevalence among  
74 HCW populations in higher TB burden settings (defined as  $\geq 300$  cases per 100,000  
75 population)(6). Earlier reviews reported similar variability with annual TBI incidence among  
76 HCWs ranging between 0.5-14.3% (5,7).

77

78 Meeting ambitious End TB strategy targets by 2035 requires a well-resourced, skilled and  
79 healthy healthcare workforce (8). The burden of TB in HCWs highlights the negative impact  
80 occupational TB and nosocomial TB transmission could have on meeting End TB targets and  
81 wider TB elimination. The burden also highlights the need for further research, and targeted  
82 policy and programming among this high priority population.

83

84 Indonesia has the third highest TB caseload internationally and an annual disease incidence  
85 of 301 per 100,000 (9). Surveillance data on the burden of TB among HCWs in Indonesia are  
86 limited, with estimates of reported TBI burden ranging from 24% among HCWs in primary  
87 healthcare centres (PHCs) to 77% in tertiary hospitals (10,11). There is limited information on  
88 TB burden in HCWs across many provinces including Yogyakarta. We aimed to measure the  
89 prevalence of infection and disease among HCWs in four healthcare facilities in Yogyakarta  
90 and explore risk factors for infection.

91

## 92 **STUDY POPULATION, DESIGN AND METHODS**

### 93 *Study setting*

94 Yogyakarta province, located in central southern Java, has an estimated TB disease incidence  
95 rate between 250-300 per 100,000 population and an estimated case detection rate of 34.2%  
96 (12). The Yogyakarta health system, like Indonesia's, encompasses several jurisdictional levels  
97 and includes both public and private providers (13). District level public and private hospitals  
98 along with PHCs provide TB services comprising case detection, diagnosis, treatment and  
99 prevention (13).

100

### 101 *Study design, site selection and study population*

102 The study selected all healthcare facilities delivering TB care within two sub-districts of two  
103 districts of Yogyakarta province. Selection of healthcare facilities in this study was targeted,  
104 based on the respective sub-district's involvement in a TB Reach funded active case finding  
105 program (14). Health office consultation, low case detection rates, geography and operational  
106 challenges such as near absence of contact tracing and testing, were reasons for sub-district

107 selection into the program. The healthcare facilities selected consisted of one private hospital  
108 treating between 100-120 TB patients per year (2018-2019) and three PHCs treating 4-20 TB  
109 patients per year (2018-2019).

110

111 The target population for this cross-sectional study was all healthcare facility staff from the  
112 four pre-selected facilities aged  $\geq 17$  years, including non-medical (e.g., management and  
113 support services) and medical staff. There were 792 HCWs across the four facilities; 613 at  
114 the private hospital and 179 staff across the PHCs.

115

#### 116 *Participant recruitment*

117 Information about the screening, including its purpose, date, and location were  
118 disseminated through advertisements in staff break rooms, online notification through the  
119 facility's human resource network, and awareness-raising sessions for staff before the period  
120 of screening. The sessions were conducted by the study team and included information on  
121 TB, TB burden in HCWs, the value of screening, the screening process, dates and location of  
122 the screening, the consent process and participant confidentiality. The study was voluntary,  
123 free of charge, and participants did not receive incentives for participating.

124

#### 125 *Data collection*

126 Screening of health workers was conducted for one week at each PHC and two weeks at the  
127 private hospital between December 2020 to May 2021. HCWs were invited to join the study  
128 at a time that was convenient to them, which could be prior to, during or after work hours.

129

130 TB infection and disease screening included symptom assessment, Chest X-ray (CXR), one spot  
131 sputum sample for GeneXpert MTB/RIF testing (if indicated) and TST. TBI was classified as TST  
132 positivity (>10mm induration or >5mm in immune suppressed participants) with no evidence  
133 of clinically manifest active TB (15,16). Standard COVID-19 infection prevention and control  
134 procedures and strategies were implemented throughout the study, with participants  
135 screening positive for COVID-19 symptoms offered a PCR test. People who tested positive for  
136 COVID-19 and/or those who had recently received a COVID-19 vaccine were followed up for  
137 TB screening during additional screening days. All tests were performed by trained healthcare  
138 professionals. Final TB diagnoses were made by the study team doctor, based on Indonesian  
139 and WHO definitions/criteria. Results and information on treatment options were  
140 disseminated by formal letter if the participant screening outcome was negative, or through  
141 a doctor consultation if TBI was diagnosed. Pending consent, participant eligibility to take TB  
142 preventive treatment (TPT) was assessed, and when relevant participants were supported to  
143 attend their chosen healthcare facility to initiate TPT according to the National guidelines.

144

145 Interview and examination data were entered electronically at the point of care using REDCap  
146 (17). The study interview collected data on participant demographic, clinical and occupational  
147 information including age, sex, healthcare role, time working in the health sector, history of  
148 TB, co-morbidities and other risk factors. All information was voluntary to disclose.

149

### 150 *Data Analysis*

151 Re-identifiable study data were exported into Stata v15 (StataCorp, College Station, TX, USA).

152 Descriptive analyses were utilised to measure TBI prevalence and examine cohort  
153 characteristics. Categorical variables were reported as numbers and proportions. Continuous  
154 variables were assessed for normality and reported as median and interquartile range (IQR).  
155  
156 Risk factors associated with TBI were investigated by examining demographic, occupational,  
157 and clinical factors using univariable and multivariable logistic regression. The effect was  
158 expressed as an unadjusted and adjusted odds ratio (OR) with 95% confidence intervals (95%  
159 CI). Variables were added to the multivariable model if  $p < 0.2$  in the univariable analyses.  
160 Those recorded only for sub-sets of the sample or demonstrating collinearity were excluded.  
161 Backward selection was employed, and selection stopped when the multivariable model  
162 Likelihood Ratio test showed only a statistically non-significant improvement in modelling.  
163 Levels of significance in the multivariable model and statistical tests were set at 5%.

164

### 165 *Ethical Approval*

166 Ethical approval was obtained from the Institutional Ethical Review Board at the University of  
167 Gadjah Mada, Indonesia and the Alfred Hospital Human Research Ethics Committee,  
168 Australia.

169

## 170 **RESULTS**

171 Participation in the study was high with 86% (n=681/792) of registered HCWs at the facilities  
172 participating, ranging from 73-94% by facility. Of the 681 participants the median age was 40  
173 years (IQR:30-48), 59% (n=401) were female, 71% (n=486) reported completing a university  
174 degree, and participant's median household size was 4 people (IQR:2-5 people) (Table 1).  
175 Nearly two thirds of participants identified as medical staff (62%, n=421), mainly nurses

176 (n=250, 37%), 77% worked in the hospital (n=524), and the median time working in the health  
 177 sector was 13 years (IQR: 6-25 years) (Table 1). Nearly half had provided services for people  
 178 with TB (46%, n=316) and 36% (n=243) had received TB training outside of their professional  
 179 qualification.

180 **Table 1** Demographic, occupational and clinical characteristics of healthcare workers  
 181 screened for TB in primary health facilities and a private hospital in two sub-districts of  
 182 Yogyakarta Indonesia

| Characteristics                             | Total (n,%) |
|---------------------------------------------|-------------|
| <b>Total</b>                                | <b>681</b>  |
| <i>Demographic Characteristics</i>          |             |
| <b>Age</b> median [IQR]                     | 40 [30-48]  |
| <b>Sex</b>                                  |             |
| Male                                        | 280 (41.1)  |
| Female                                      | 401 (58.9)  |
| <b>Education</b>                            |             |
| High School Degree or Less                  | 195 (28.6)  |
| University Degree                           | 486 (71.4)  |
| <b>Household size</b> , median [IQR]        | 4 [3-5]*    |
| <b>Household expenses</b>                   |             |
| < Rp. 2.2 million per month (low)           | 188 (27.6)  |
| Rp. 2.2 - 5 million per month (medium)      | 364 (53.5)  |
| > Rp. 5 million per month (high)            | 105 (15.4)  |
| Missing                                     | 24 (3.5)    |
| <i>Occupational Characteristics</i>         |             |
| <b>Health facility type</b>                 |             |
| Hospital                                    | 524 (76.9)  |
| Primary Health Centre                       | 157 (23.1)  |
| <b>Occupation category</b>                  |             |
| <i>Medical</i>                              | 421 (61.8)  |
| Nurse                                       | 250 (37.0)  |
| Dentist                                     | 2 (0.3)     |
| Laboratory Scientists                       | 18 (2.6)    |
| Nutritionist                                | 15 (2.2)    |
| Environmental Health                        | 2 (0.3)     |
| Epidemiologist                              | 6 (0.9)     |
| Radiographer                                | 9 (1.3)     |
| Midwife                                     | 47 (6.9)    |
| Rehabilitation staff (e.g. physiotherapist) | 14 (2.1)    |

| <b>Characteristics</b>                                                                     | <b>Total<br/>(n,%)</b> |
|--------------------------------------------------------------------------------------------|------------------------|
| Health Promotion Nurse                                                                     | 2 (0.3)                |
| Pharmacist and assistants                                                                  | 43 (6.3)               |
| Doctor                                                                                     | 12 (1.8)               |
| Psychologist                                                                               | 1 (0.1)                |
| <i>Non-Medical</i>                                                                         | <b>258 (37.9)</b>      |
| Administrative staff                                                                       | 82 (12.0)              |
| Management                                                                                 | 4 (0.6)                |
| Community Health Workers                                                                   | 23 (3.4)               |
| Other non-medical personnel (e.g. cleaners and cooks)                                      | 149 (21.9)             |
| <i>Missing</i>                                                                             | <b>2 (0.3)</b>         |
| <b>Length of time working in the health sector (years), median [IQR]</b>                   | <b>13 [6-25]</b>       |
| <b>Length of time at this health facility (years), median [IQR]</b>                        | <b>11 [4-24]^</b>      |
| <b>Provided services / care to a person diagnosed with tuberculosis</b>                    |                        |
| No                                                                                         | 365 (53.6)             |
| Yes                                                                                        | 316 (46.4)             |
| <b>Length of time provided services / care to people with TB (years),<br/>median [IQR]</b> | <b>7 [2-17]</b>        |
| <b>Received TB training outside of professional qualification</b>                          |                        |
| No                                                                                         | 436 (64.0)             |
| Yes                                                                                        | 243 (35.7)             |
| Missing                                                                                    | 2 (0.3)                |
| <b>Received training on personal protective equipment</b>                                  |                        |
| No                                                                                         | 114 (16.7)             |
| Yes                                                                                        | 565 (83.0)             |
| Missing                                                                                    | 2 (0.3)                |
| <i>Clinical characteristics</i>                                                            |                        |
| <b>Nutritional status<sup>#</sup></b>                                                      |                        |
| Underweight (BMI < 18.5)                                                                   | 41 (6.0)               |
| Normal weight (BMI >= 18.5 to < 23)                                                        | 190 (27.9)             |
| Overweight (BMI =>23 to < 25)                                                              | 126 (18.5)             |
| Obese (BMI >= 25)                                                                          | 324 (47.6)             |
| <b>Smoking status</b>                                                                      |                        |
| No, never smoked                                                                           | 488 (71.7)             |
| No, but previously smoked                                                                  | 94 (13.8)              |
| Currently smoke                                                                            | 99 (14.5)              |
| <b>Self-reported diabetes mellitus status</b>                                              |                        |
| No                                                                                         | 617 (90.6)             |
| Yes                                                                                        | 24 (3.5)               |
| Unsure                                                                                     | 40 (5.9)               |
| <b>Self-reported HIV Status</b>                                                            |                        |
| Positive                                                                                   | 0 (0)                  |

| <b>Characteristics</b>                                    | <b>Total<br/>(n,%)</b> |
|-----------------------------------------------------------|------------------------|
| Negative                                                  | 190 (27.9)             |
| Unsure                                                    | 491 (72.1)             |
| <b>Self-reported Pregnancy Status Among Females</b>       |                        |
| No                                                        | 390 (97.3)             |
| Yes                                                       | 11 (2.7)               |
| <b>Lived with someone who had TB for at least one day</b> |                        |
| No                                                        | 582 (85.5%)            |
| Yes                                                       | 91 (13.4%)             |
| Unsure                                                    | 8 (1.2%)               |
| <b>Timing of living with someone with TB</b>              |                        |
| Before person with TB started treatment                   | 79 (86.8)              |
| After person with TB started treatment                    | 11 (12.1)              |
| Unsure                                                    | 1 (1.1)                |
| <b>Previously been treated for TB</b>                     |                        |
| No                                                        | 621 (91.2)             |
| Yes, finished treatment                                   | 59 (8.7)               |
| Yes, currently on medication                              | 1 (0.1)                |
| <i>Treated</i>                                            |                        |

183 \*656/681 participants responded  
 184 ^ 678/681 participants responded  
 185 # BMI classification for people born in Asia (18)

186

187 Among the 681 participants, 67% (n=450) were overweight or obese, 29% currently (15%,  
 188 n=99) or previously (14%, n=94) smoked, self-reported diabetes mellitus (DM) prevalence was  
 189 4% (n=24), HIV status was known or disclosed among 28% (n=190) of participants and all were  
 190 negative (18) (Table 1). Ninety-one participants (13%, n=91) reported ever having lived with  
 191 someone who had TB, mostly (87%, n=79/91) before the person started TB treatment. Sixty  
 192 participants reported ever having TB (9%, n=60), of whom 75% were females (n=45), 73%  
 193 (n=44) were medical staff, the median time in the health sector was 10 years (IQR: 5-16 years),  
 194 60% (n=36) had provided services for people with TB, and 17% (n=10) had lived with someone  
 195 with TB for at least one day (Table 2).

196 **Table 2:** Characteristics associated with self-reported previous TB disease among healthcare workers in primary health facilities and a private  
 197 hospital in two sub-districts of Yogyakarta Indonesia

| <b>Characteristics</b>                                                   | <b>Total</b><br>(n, %) | <b>No Previous TB History</b><br>(n, %) | <b>History of TB Disease</b><br>(n, %) |
|--------------------------------------------------------------------------|------------------------|-----------------------------------------|----------------------------------------|
| <b>Total</b>                                                             | <b>681</b>             | <b>621</b>                              | <b>60</b>                              |
| <i>Demographic Characteristics</i>                                       |                        |                                         |                                        |
| <b>Age (years), median [IQR]</b>                                         | 40 (30.4-48.1)         | 40.8 (30.6-48.3)                        | 33.7 (28.95-42.8)                      |
| <b>Sex</b>                                                               |                        |                                         |                                        |
| Female                                                                   | 401 (58.9)             | 356 (57.3)                              | 45 (75.0)                              |
| Male                                                                     | 280 (41.1)             | 265 (42.7)                              | 15 (25.0)                              |
| <b>Education</b>                                                         |                        |                                         |                                        |
| High School Degree or Less                                               | 195 (28.6)             | 185 (29.8)                              | 10 (16.7)                              |
| University Degree                                                        | 486 (71.4)             | 436 (70.2)                              | 50 (83.3)                              |
| <b>Household Size (people), median [IQR]</b>                             | 4 (3-5)                | 4 (3-5)                                 | 4 (3-5)                                |
| <b>Household expenses*</b>                                               |                        |                                         |                                        |
| < Rp. 2.2 million per month (low)                                        | 188 (28.6)             | 176 (29.3)                              | 12 (21.1)                              |
| Rp. 2.2 - 5 million per month (medium)                                   | 364 (55.4)             | 330 (55.0)                              | 34 (59.6)                              |
| > Rp. 5 million per month (high)                                         | 105 (16.0)             | 94 (15.7)                               | 11 (19.3)                              |
| <i>Occupational Characteristics</i>                                      |                        |                                         |                                        |
| <b>Health Facility</b>                                                   |                        |                                         |                                        |
| Primary Health Facility                                                  | 157 (23.1)             | 144 (23.2)                              | 13 (21.7)                              |
| Hospital                                                                 | 524 (76.9)             | 477 (76.8)                              | 47 (78.3)                              |
| <b>Occupation</b>                                                        |                        |                                         |                                        |
| Non-Medical                                                              | 258 (37.9)             | 242 (39.0)                              | 16 (26.7)                              |
| Medical                                                                  | 421 (61.8)             | 377 (60.7)                              | 44 (73.3)                              |
| Missing                                                                  | 2 (0.3)                | 2 (0.3)                                 | 0 (0)                                  |
| <b>Length of time working in the health sector (years), median [IQR]</b> | 13 (6-25)              | 14 (6-25)                               | 10 (5-16)                              |

| <b>Characteristics</b>                                                                 | <b>Total</b><br>(n, %) | <b>No Previous TB History</b><br>(n, %) | <b>History of TB Disease</b><br>(n, %) |
|----------------------------------------------------------------------------------------|------------------------|-----------------------------------------|----------------------------------------|
| <b>Total</b>                                                                           | <b>681</b>             | <b>621</b>                              | <b>60</b>                              |
| <b>Length of time in working in this facility (years), median [IQR]</b>                | 11 (4-24)              | 12 (4-24)                               | 9.5 (3-15)                             |
| <b>Provided services / care to a person diagnosed with tuberculosis</b>                |                        |                                         |                                        |
| No                                                                                     | 365 (53.6)             | 341 (54.9)                              | 24 (40.0)                              |
| Yes                                                                                    | 316 (46.4)             | 280 (45.1)                              | 36 (60.0)                              |
| <i>Length of time provided services / care to people with TB (years), median [IQR]</i> | 7 (2-17)               | 7 (2-17)                                | 10 (4-20)                              |
| <b>Received TB training outside of professional qualification<sup>^</sup></b>          |                        |                                         |                                        |
| No                                                                                     | 436 (64.0)             | 398 (64.1)                              | 38 (63.3)                              |
| Yes                                                                                    | 243 (35.7)             | 221 (35.6)                              | 22 (36.7)                              |
| Missing                                                                                | 2 (0.3)                | 2 (0.3)                                 | 0 (0)                                  |
| <b>Received training on personal protective equipment</b>                              |                        |                                         |                                        |
| No                                                                                     | 114 (16.7)             | 105 (16.9)                              | 9 (15.0)                               |
| Yes                                                                                    | 565 (83.0)             | 514 (82.8)                              | 51 (85.0)                              |
| Missing                                                                                | 2 (0.3)                | 2 (0.3)                                 | 0 (0)                                  |
| <i>Clinical characteristics</i>                                                        |                        |                                         |                                        |
| <b>Nutritional status</b>                                                              |                        |                                         |                                        |
| Underweight (BMI < 18.5)                                                               | 41 (6.0)               | 39 (6.3)                                | 2 (3.3)                                |
| Normal weight (BMI >= 18.5 to < 23)                                                    | 190 (27.9)             | 165 (26.6)                              | 25 (41.7)                              |
| Overweight (BMI =>23 to < 25)                                                          | 126 (18.5)             | 113 (18.2)                              | 13 (21.7)                              |
| Obese (BMI >= 25)                                                                      | 324 (47.6)             | 304 (49.0)                              | 20 (33.3)                              |
| <b>Smoking Status</b>                                                                  |                        |                                         |                                        |
| No - never smoked                                                                      | 488 (71.7)             | 441 (71.0)                              | 47 (78.3)                              |
| No – but previously smoked                                                             | 94 (13.8)              | 89 (14.3)                               | 5 (8.3)                                |
| Yes                                                                                    | 99 (14.5)              | 91 (14.7)                               | 8 (13.3)                               |

| <b>Characteristics</b>                                    | <b>Total</b><br>(n, %) | <b>No Previous TB History</b><br>(n, %) | <b>History of TB Disease</b><br>(n, %) |
|-----------------------------------------------------------|------------------------|-----------------------------------------|----------------------------------------|
| <b>Total</b>                                              | <b>681</b>             | <b>621</b>                              | <b>60</b>                              |
| <b>Self-Reported Diabetes Mellitus Status</b>             |                        |                                         |                                        |
| No                                                        | 617 (90.6)             | 561 (90.3)                              | 56 (93.3)                              |
| Yes                                                       | 24 (3.5)               | 23 (3.7)                                | 1 (1.7)                                |
| Unsure                                                    | 40 (5.9)               | 37 (6.0)                                | 3 (5.0)                                |
| <b>Self-Reported HIV Status</b>                           |                        |                                         |                                        |
| Positive                                                  | 0 (0)                  | 0 (0)                                   | 0 (0)                                  |
| Negative                                                  | 190 (27.9)             | 167 (26.9)                              | 23 (38.3)                              |
| Unsure                                                    | 491 (72.1)             | 454 (73.1)                              | 37 (61.7)                              |
| <b>Self-Reported Pregnancy Status Among Females</b>       |                        |                                         |                                        |
| No                                                        | 390 (97.3)             | 345 (96.9)                              | 45 (100.0)                             |
| Yes                                                       | 11 (2.7)               | 11 (3.1)                                | 0 (0)                                  |
| <b>Lived with someone who had TB for at least one day</b> |                        |                                         |                                        |
| No                                                        | 582 (85.5)             | 533 (85.8)                              | 49 (81.7)                              |
| Yes                                                       | 91 (13.4)              | 81 (13.0)                               | 10 (16.7)                              |
| Unsure                                                    | 8 (1.2)                | 7 (1.1)                                 | 1 (1.7)                                |

198 \*657/681 participants responded

199 ^ 678/681 participants responded

200 During screening, 1% (n=5/681) of participants reported cough for more than two weeks or  
 201 haemoptysis. Of those CXR screened (n=662; eight participants refused and 11 were  
 202 pregnant), 36% had a lung or pleural abnormality (n=239/662), and 15% (n=97/662) of  
 203 findings were consistent with possible active TB disease requiring further investigation and  
 204 assessment (Table 3). Of the 15% of participants (n=99/662) with a combined symptom screen  
 205 positive and/or a CXR suggestive of TB, none were diagnosed microbiologically (via Xpert  
 206 MTB/RIF of sputum) or clinically with TB disease.

207

208 **Table 3:** Chest X-ray findings among healthcare workers with an abnormal chest X-ray in  
 209 primary health facilities and a private hospital in two sub-districts of Yogyakarta Indonesia

| Chest X-Ray Abnormality           | Suggestive of TB | Not Suggestive of TB | Total         |
|-----------------------------------|------------------|----------------------|---------------|
| <b>Total</b>                      | <b>N=97*</b>     | <b>N=147*</b>        | <b>N=239*</b> |
| Infiltrates                       | 93               | 0                    | 93            |
| Consolidation                     | 0                | 0                    | 0             |
| Cavity                            | 1                | 0                    | 1             |
| Calcification                     | 1                | 1                    | 2             |
| Pleural Effusion                  | 2                | 0                    | 0             |
| Fibrosis                          | 5                | 11                   | 16            |
| Increased Bronchovascular Marking | 46               | 102                  | 148           |
| Emphysematous Lung                | 1                | 3                    | 4             |
| Lymphadenopathy                   | 1                | 1                    | 2             |
| Tented Diaphragm                  | 1                | 1                    | 2             |

210  
 211  
 212

\*The denominator for the columns are the totals listed, not the total abnormalities listed. Some participants had more than one x-ray abnormality.

213 TST was offered to all participants who had not reported previously receiving TB treatment  
 214 (n=621). It was administered to 78% (n=489/621) of those eligible and read in 90%  
 215 (n=441/489) of them (Figure 1). TBI was diagnosed in 25% (95% CI: 22-30) of HCWs  
 216 (n=112/441), most being HCWs in the hospital setting (86%; n=96/112) (Table 3). TBI  
 217 prevalence differed between the hospital setting (31%, 95% CI: 26-37%; n=96/306) and PHCs  
 218 (12%, 95% CI: 1-19%; n=16/135).

219 Of the 112 participants diagnosed with TBI, 8% (n=9) were underweight, 35% currently (19%,  
220 n=21) or previously (16%, n=18) smoked, 5% (n=6) reported having DM and 80% (n=90) were  
221 unsure of or unwilling to disclose their HIV status (Table 4). A significant association on  
222 multivariable logistic regression was found between TBI and being male (adjusted OR 2.02  
223 (95%CI: 1.29-3.17)), currently working in the participating hospital compared to the PHCs  
224 (adjusted OR 3.15 (95%CI: 1.75-5.66)), and older age (1.05 OR increase per year of life  
225 between 19-73 years (95%CI: 1.02-1.06)) (Table 4).

226 **Table 4:** Characteristics associated with TB infection among healthcare workers in primary health facilities and a private hospital in two sub-  
 227 districts of Yogyakarta Indonesia.

| Characteristics                                                          | Total<br>(n, %) | No TB infection<br>(n, %) | TB infection<br>(n, %) | Unadjusted Odds<br>Ratio (OR)<br>[95% CI] | Adjusted Odds<br>Ratio (aOR)<br>[95% CI] |
|--------------------------------------------------------------------------|-----------------|---------------------------|------------------------|-------------------------------------------|------------------------------------------|
| <b>Total</b>                                                             | <b>441</b>      | <b>329</b>                | <b>112</b>             |                                           |                                          |
| <b>Age (years), median [IQR]</b>                                         | 41.1 (31-48.8)  | 39.7 (30.5-48.1)          | 45.8 (36.3-51.9)       | 1.05 [1.02-1.07]                          | 1.05 [1.02-1.06]                         |
| <b>Sex</b>                                                               |                 |                           |                        |                                           |                                          |
| Female                                                                   | 261 (59.2)      | 211 (64.1)                | 50 (44.6)              | REF                                       | REF                                      |
| Male                                                                     | 180 (40.8)      | 118 (35.9)                | 62 (55.4)              | 2.22 [1.43-3.43]                          | 2.02 [1.29-3.17]                         |
| <b>Education</b>                                                         |                 |                           |                        |                                           |                                          |
| High School Degree or Less                                               | 153 (34.7)      | 102 (31.0)                | 51 (45.5)              | REF                                       | -                                        |
| University Degree                                                        | 288 (65.3)      | 227 (69.0)                | 61 (54.5)              | 0.54 [0.35-0.83]                          | -                                        |
| <b>Household Size (people), median [IQR]</b>                             | 4 (3-5)         | 4 (3-5)                   | 4 (3-5)                | 1.12 [0.96-1.30]                          | -                                        |
| <b>Household expenses</b>                                                |                 |                           |                        |                                           |                                          |
| < Rp. 2.2 million per month (low)                                        | 129 (30.4)      | 94 (29.7)                 | 35 (32.4)              | REF                                       | -                                        |
| Rp. 2.2 - 5 million per month (medium)                                   | 231 (54.4)      | 178 (56.2)                | 53 (49.1)              | 0.80 [0.49-1.31]                          | -                                        |
| > Rp. 5 million per month (high)                                         | 65 (15.3)       | 45 (14.2)                 | 20 (18.5)              | 1.19 [0.62-2.30]                          | -                                        |
| <b>Health Facility</b>                                                   |                 |                           |                        |                                           |                                          |
| Primary Health Facility                                                  | 135 (30.6)      | 119 (36.2)                | 16 (14.3)              | REF                                       | REF                                      |
| Hospital                                                                 | 306 (69.4)      | 210 (63.8)                | 96 (85.7)              | 3.40 [1.91-6.04]                          | 3.15 [1.75-5.66]                         |
| <b>Occupation</b>                                                        |                 |                           |                        |                                           |                                          |
| Non-Medical                                                              | 198 (44.0)      | 141 (42.9)                | 57 (50.9)              | REF                                       | -                                        |
| Medical                                                                  | 242 (55.0)      | 187 (56.8)                | 55 (49.1)              | 0.72 [0.47-1.12]                          | -                                        |
| <b>Length of time working in the health sector (years), median [IQR]</b> | 15 (7-25)       | 13 (7-24.3)               | 22.5 (8-29)            | 1.03 [1.01-1.06]                          | -                                        |
| <b>Length of time in working in this facility (years), median [IQR]</b>  | 12 (5-24)       | 11 (5-24)                 | 20 (5.5-27.5)          | 1.04 [1.01-1.06]                          | -                                        |
| <b>Provided services / care to a person diagnosed with tuberculosis</b>  |                 |                           |                        |                                           |                                          |

| Characteristics                                                   | Total      | No TB infection | TB infection | Unadjusted Odds Ratio (OR) | Adjusted Odds Ratio (aOR) |
|-------------------------------------------------------------------|------------|-----------------|--------------|----------------------------|---------------------------|
|                                                                   | (n, %)     | (n, %)          | (n, %)       | [95% CI]                   | [95% CI]                  |
| <b>Total</b>                                                      | <b>441</b> | <b>329</b>      | <b>112</b>   |                            |                           |
| No                                                                | 272 (61.7) | 208 (63.2)      | 64 (57.1)    | REF                        | -                         |
| Yes                                                               | 169 (38.3) | 121 (36.8)      | 48 (42.9)    | 1.30 [0.83-1.99]           | -                         |
| <b>Received TB training outside of professional qualification</b> |            |                 |              |                            |                           |
| No                                                                | 294 (67.0) | 215 (65.7)      | 79 (70.5)    | REF                        | -                         |
| Yes                                                               | 145 (33.0) | 112 (34.3)      | 33 (29.5)    | 0.80 [0.50-1.28]           | -                         |
| <b>Received training on personal protective equipment</b>         |            |                 |              |                            |                           |
| No                                                                | 82 (18.7)  | 62 (19.0)       | 20 (17.9)    | REF                        | -                         |
| Yes                                                               | 357 (81.3) | 265 (81.0)      | 92 (82.1)    | 1.08 [0.62-1.88]           | -                         |
| <b>Nutritional status</b>                                         |            |                 |              |                            |                           |
| Underweight (BMI < 18.5)                                          | 32 (7.3)   | 23 (7.0)        | 9 (8.0)      | REF                        | -                         |
| Normal weight (BMI >= 18.5 to < 23)                               | 115 (26.1) | 91 (27.7)       | 24 (21.4)    | 0.67[0.28-1.64]            | -                         |
| Overweight (BMI =>23 to < 25)                                     | 78 (17.7)  | 62 (18.8)       | 16 (14.3)    | 0.66 [0.26-1.70]           | -                         |
| Obese (BMI >= 25)                                                 | 216 (49.0) | 153 (46.5)      | 63 (56.2)    | 1.05 [0.46-2.40]           | -                         |
| <b>Smoking Status</b>                                             |            |                 |              |                            |                           |
| No - never smoked                                                 | 316 (71.7) | 243 (73.9)      | 73 (65.2)    | REF                        | -                         |
| No – but previously smoked                                        | 65 (14.7)  | 47 (14.3)       | 18 (16.1)    | 1.27 [0.70-2.33]           | -                         |
| Yes                                                               | 60 (13.6)  | 39 (11.9)       | 21 (18.8)    | 1.79 [0.99-3.24]           | -                         |
| <b>Self-Reported Diabetes Mellitus Status</b>                     |            |                 |              |                            |                           |
| No                                                                | 394 (89.3) | 297 (90.3)      | 97 (86.6)    | REF                        | -                         |
| Yes                                                               | 19 (4.3)   | 13 (4.0)        | 6 (5.4)      | 1.41 [0.52-3.82]           | -                         |
| Unsure                                                            | 28 (6.3)   | 19 (5.8)        | 9 (8.0)      | 1.45 [0.64-3.31]           | -                         |
| <b>Self-Reported HIV Status</b>                                   |            |                 |              |                            |                           |
| Positive                                                          | 0 (0)      | 0 (0)           | 0 (0)        | -                          | -                         |

| <b>Characteristics</b>                                    | <b>Total</b><br>(n, %) | <b>No TB infection</b><br>(n, %) | <b>TB infection</b><br>(n, %) | <b>Unadjusted Odds Ratio (OR)</b><br>[95% CI] | <b>Adjusted Odds Ratio (aOR)</b><br>[95% CI] |
|-----------------------------------------------------------|------------------------|----------------------------------|-------------------------------|-----------------------------------------------|----------------------------------------------|
| <b>Total</b>                                              | <b>441</b>             | <b>329</b>                       | <b>112</b>                    |                                               |                                              |
| Negative                                                  | 108 (24.5)             | 86 (26.1)                        | 22 (19.6)                     | REF                                           | -                                            |
| Unsure                                                    | 333 (75.5)             | 243 (73.9)                       | 90 (80.4)                     | 1.45 [0.85-2.45]                              | -                                            |
| <b>Self-Reported Pregnancy Status Among Females</b>       |                        |                                  |                               |                                               |                                              |
| No                                                        | 254 (97.3)             | 204 (96.7)                       | 50 (100.0)                    | -                                             | -                                            |
| Yes                                                       | 7 (2.7)                | 7 (3.3)                          | 0 (0)                         | -                                             | -                                            |
| <b>Lived with someone who had TB for at least one day</b> |                        |                                  |                               |                                               |                                              |
| No                                                        | 376 (85.3)             | 286 (86.9)                       | 90 (80.4)                     | REF                                           | -                                            |
| Yes                                                       | 59 (13.4)              | 38 (11.6)                        | 21 (18.8)                     | 1.76 [0.98-3.15]                              | -                                            |
| Unsure                                                    | 6 (1.4)                | 5 (1.5)                          | 1 (0.9)                       | 0.64 [0.07-5.51]                              | -                                            |

## 229 **DISCUSSION**

230 In this study among HCWs in four healthcare facilities in Yogyakarta, no HCWs were diagnosed  
231 microbiologically or clinically with active TB disease, although 9% reported previous or current  
232 TB disease. TBI was diagnosed in 25% of those eligible for TST and who had the TST read; this  
233 was highest in staff from the hospital (31%, 95% CI: 26-37). A significant association was found  
234 between TBI and being male, currently working in the participating hospital and older age.

235

236 Annual incidence of active TB disease among HCWs has been reported to range from 69-5,780  
237 per 100,000 population, and has consistently been documented to be higher than the general  
238 population (5). No active disease was diagnosed during the study, which could suggest low  
239 disease incidence in this population of HCWs, adequate disease diagnosis and detection  
240 programs within these health facilities, or could be due to the cross-sectional nature of the  
241 screening. However, self-reported past TB disease prevalence of 9% suggests disease  
242 incidence may be relatively high. This prevalence was similar to reported past disease among  
243 HCWs in a tertiary hospital in Bandung, Indonesia (11).

244

245 Prevalence of TBI (using TST) among HCWs in LMICs has been reported to range from 14–98%  
246 (mean 49%), and is higher among HCWs in high burden settings (pooled estimate of 55%, 95%  
247 CI 41-69%) (6). Our study findings of 25% were lower than this, and lower than a prevalence  
248 study conducted in a public tertiary hospital in Bandung, Indonesia that reported a 77% TST  
249 positivity (10,11). Our results, however, are similar to TBI prevalence studies across PHCs in  
250 Semarang, Indonesia (24%). Modelled community level TBI prevalence of 46% across  
251 Indonesia is also higher than the prevalence reported in our study (19). However, Yogyakarta  
252 province does have a lower estimated TB incidence (between 250-300 per 100,000

253 population) compared to the Indonesian average, and infection may parallel this trend,  
254 although prevalence estimates for TBI do not exist at this jurisdictional level (12).

255

256 Being male and increasing age as non-occupational risk factors for TBI among HCWs are  
257 consistent with several international studies (6,20–26). Male sex as a risk factor for TBI and  
258 disease is well documented (27,28), however the role of biological, social and structural  
259 factors for this increased risk is still undetermined, as is exposure risk behaviour (27). Other  
260 studies have found other non-occupational factors associated with TBI such as education  
261 level, smoking status, diabetes mellitus and household contact with a person with TB (5,6).  
262 Our study did not find an independent association between these factors and TBI in this  
263 population of HCWs.

264

265 The evidence is varied surrounding occupational factors as risk factors for TBI, such as years  
266 of work in the healthcare sector, contact with a TB patient, occupation type or work location  
267 (5,6,20,22,23,29). Our study did not find any individual occupational risk factors associated  
268 with TBI in health services that provide TB services, although we did find a significantly higher  
269 odds of infection among those working in the participating private hospital compared to the  
270 primary care facilities. This may allude to differences in provision of care, especially TB care,  
271 health facility IPC policy and procedure, and health facility infrastructure and layout.  
272 Persistent occupational TB exposure and poor levels of TBI control implementation in LMICs  
273 is a known significant factor for the increased risk of HCWs contracting TB (30). Higher risk of  
274 acquiring TB has been associated with certain work locations such as inpatient TB services,  
275 general medicine wards, emergency rooms and laboratories compared to medium risk for  
276 outpatient and surgical services, compared to the general populations (6). Similarly, certain

277 occupations have had higher incidence of infection such as allied health, physicians and  
278 nurses (5,6).

279

280 Control measures may decrease annual TB incidence among HCWs by as much as 81% in high  
281 incidence settings (30). Even administrative controls alone, such as routine patient and HCW  
282 screening, have proven effective in decreasing the risk for TBI among HCWs in LMICs,  
283 suggesting these should be prioritised (5). The lack of implementation and scale-up of  
284 preventive measures, particularly failure to rapidly diagnose and treat TB, are primarily  
285 responsible for nosocomial transmission (30). The World Health Organization's policy on TBI  
286 control in healthcare facilities recommends conducting routine screening and surveillance of  
287 TB disease among HCWs (4). Despite the benefits and recommendations, the implementation  
288 of these policies, IPC procedures and surveillance in high burden and/or LMICs is low (30).  
289 During the study period healthcare facilities in Indonesia did not routinely screen for active  
290 TB or TBI or provide preventive therapy for their staff, even though HCWs have been listed as  
291 high-risk in the 2016-2020 National Strategic Plan and should be provided with these services  
292 (31). Budget distribution, the lack of a national guideline for HCW screening and lack of  
293 healthcare facility awareness have been listed as reasons for this lack of implementation.

294

295 This study has some limitations. Primarily, the cross-sectional design and target population of  
296 all staff at pre-selected study sites meant that while all facilities in the sub-districts  
297 participated, the prevalence of TB among HCWs and characteristics associated with TBI may  
298 not be generalisable to the district, provincial or sub-national level. Ascertaining the  
299 acquisition source for infection was not possible, with community sources possible in addition  
300 to healthcare facility sources. Secondly, 14% of HCW registered at the facilities did not

301 participate, close to 20% of eligible participants did not have a TST administered, and 10%  
302 were loss to follow up for TST reading. Attrition at each stage may have introduced bias and  
303 potentially over or under-estimated the prevalence and association estimates. The main  
304 reason for not having a TST administered was due to the recommendation to delay TST for 4-  
305 weeks post COVID-19 vaccination (32). The screening service did return after the vaccination  
306 roll-out at the facility, however, few participants returned. Thirdly, the limitations with TST's  
307 sensitivity and specificity may have over or under estimated the prevalence of TBI (33).  
308 Fourthly, categorising HCW occupation, due to small numbers, may have skewed the  
309 association with TBI. Finally, besides BMI and TB investigations, all clinical characteristics were  
310 self-reported, which may have introduced bias, over or under-estimating the association  
311 between characteristics and TBI. Strengths of this study include high participation proportions  
312 across the facilities, the use of radiological and microbiological diagnostic tools, the collection  
313 of detailed demographic, occupational and clinical characteristics to investigate risk factors  
314 for TBI, and the participation of non-medical healthcare workers to explore occupational risk  
315 of TB.

316

## 317 **CONCLUSION**

318 Indonesia is a high incidence setting for TB, and nosocomial and occupational TB hinder TB  
319 elimination efforts. This study supports prioritisation of HCWs as a high-risk group for TB  
320 infection and disease, and the need for comprehensive prevention and control programs in  
321 Indonesia. These include annual staff TB screening, ensuring implementation of IPC  
322 procedures in facilities, TB infection and disease surveillance, access to preventive therapy  
323 and clear national guidelines. Further, it identifies characteristics of HCWs in Yogyakarta at

324 higher risk, identifying certain groups who could be prioritised in screening programs if  
325 universal coverage of prevention and control measures cannot be achieved.

326

## 327 **ACKNOWLEDGEMENTS**

328 The authors wish to thank the Zero TB Yogyakarta Programme, Yogyakarta Provincial and  
329 District Health offices, and the healthcare facilities and health care workers that participated;  
330 and Associate Professor, A Richardson, for her statistical expertise, review of the data analysis  
331 and subsequent suggestions.

332 The study was endorsed by the Indonesian NTP, Yogyakarta Provincial Government and  
333 Health Office, Yogyakarta City and Kulon Progo District Health Offices and associated health  
334 facilities involved in the research.

335

## 336 **REFERENCES**

- 337 1. World Health Organization. Global tuberculosis report 2022. Geneva; Licence: CC BY-  
338 NC-SA 3.0 IGO; 2022.
- 339 2. Uden L, Barber E, Ford N, Cooke GS. Risk of Tuberculosis Infection and Disease for  
340 Health Care Workers: An Updated Meta-Analysis. *Open Forum Infect Dis*. 2017/09/07.  
341 2017;4(3):ofx137.
- 342 3. Nasreen S, Shokoohi M, Malvankar-Mehta MS. Prevalence of Latent Tuberculosis  
343 among Health Care Workers in High Burden Countries: A Systematic Review and Meta-  
344 Analysis. *PLoS One*. 2016/10/07. 2016;11(10):e0164034.
- 345 4. World Health Organization. WHO Policy on TB Infection Control in Health-care  
346 Facilities, Congregate Settings and Households. Copyright WHO 2009.  
347 WHO/HTM/TB/2009.419.
- 348 5. Joshi R, Reingold AL, Menzies D, Pai M. Tuberculosis among health-care workers in low-

- 349 and middle-income countries: a systematic review. *PLoS Med.* 2006/12/30.  
350 2006;3(12):e494.
- 351 6. Apriani L, McAllister S, Sharples K, Alisjahbana B, Ruslami R, Hill PC, et al. Latent  
352 tuberculosis infection in healthcare workers in low- and middle-income countries: an  
353 updated systematic review. *Eur Respir J.* 2019;53(4):1801789.
- 354 7. Baussano I, Nunn P, Williams B, Pivetta E, Bugiani M, Scano F. Tuberculosis among  
355 health care workers. *Emerg Infect Dis.* 2011/03/12. 2011;17(3):488–94.
- 356 8. World Health Organization. Gear up to end TB: Introducing the end TB Strategy  
357 [Internet]. Geneva PP - Geneva: World Health Organization; 2015. Available from:  
358 <https://apps.who.int/iris/handle/10665/156394>. Access Date: 14 September 2021
- 359 9. World Health Organization. Global Tuberculosis Report 2021 [Internet]. 2021. Available  
360 from: [https://www.who.int/teams/global-tuberculosis-programme/tb-reports/global-](https://www.who.int/teams/global-tuberculosis-programme/tb-reports/global-tuberculosis-report-2021)  
361 [tuberculosis-report-2021](https://www.who.int/teams/global-tuberculosis-programme/tb-reports/global-tuberculosis-report-2021)
- 362 10. Erawati M, Andriany M. The prevalence and demographic risk factors for latent  
363 tuberculosis infection (LTBI) among healthcare workers in Semarang, Indonesia. *J*  
364 *Multidiscip Healthc.* 2020;13:197–206.
- 365 11. Apriani L, McAllister S, Sharples K, Nurul Aini I, Nurhasanah H, Ruslami R, et al.  
366 *Mycobacterium tuberculosis* infection and disease in healthcare workers in a tertiary  
367 referral hospital in Bandung, Indonesia. *J Infect Prev.* 2022 Feb 28;23(4):155–66.
- 368 12. Parwati CG, Farid MN, Nasution HS, Basri C, Lolong D, Gebhard A, et al. Estimation of  
369 subnational tuberculosis burden: generation and application of a new tool in  
370 Indonesia. *Int J Tuberc lung Dis Off J Int Union against Tuberc Lung Dis.* 2020  
371 Feb;24(2):250–7.
- 372 13. Mahendradhata Y, Trisnantoro L, Listyadewi S, Soewondo P, Marthias T, Harimurti P,

- 373 et al. The Republic of Indonesia Health System Review [Internet]. Health Sys. New Delhi  
374 PP - New Delhi: WHO Regional Office for South-East Asia; 2017. Available from:  
375 <https://apps.who.int/iris/handle/10665/254716>. Date Accessed: 9 September 2021
- 376 14. Stop TB Partnership. TB Reach Wave 7 [Internet]. 2021. Available from:  
377 <http://www.stoptb.org/global/awards/tbreach/wave7.asp>. Date Accessed: 5  
378 September 2021.
- 379 15. World Health Organization. WHO consolidated guidelines on tuberculosis: module 1:  
380 prevention: tuberculosis preventive treatment [Internet]. Geneva; 2020. Available  
381 from: <https://www.who.int/publications/i/item/9789240001503>
- 382 16. Jensen PA, Lambert LA, Iademaro MF, Ridzon R. Guidelines for preventing the  
383 transmission of Mycobacterium tuberculosis in health-care settings, 2005. (MMWR.  
384 Recommendations and reports : Morbidity and mortality weekly report.  
385 Recommendations and reports ; v. 54, no. RR-17; vol. 54).
- 386 17. Harris PA, Taylor R, Thielke R, Payne J, Gonzalez N, Conde JG. Research electronic data  
387 capture (REDCap)—A metadata-driven methodology and workflow process for  
388 providing translational research informatics support. J Biomed Inform.  
389 2009;42(2):377–81.
- 390 18. World Health Organization. Appropriate body-mass index for Asian populations and its  
391 implications for policy and intervention strategies. Lancet [Internet].  
392 2004;363(9403):157–63. Available from:  
393 <https://www.sciencedirect.com/science/article/pii/S0140673603152683>
- 394 19. Houben RMGJ, Dodd PJ. The Global Burden of Latent Tuberculosis Infection: A Re-  
395 estimation Using Mathematical Modelling. PLOS Med. 2016 Oct 25;13(10):e1002152.
- 396 20. Powell K, Han D, Hung N V, Vu T, Sy DN, Trinh TT, et al. Prevalence and risk factors for

- 397 tuberculosis infection among personnel in two hospitals in Viet Nam. *Int J Tuberc lung*  
398 *Dis Off J Int Union against Tuberc Lung Dis.* 2011 Dec;15(12):1643–9.
- 399 21. Kiertiburanakul S, Suebsing S, Kehachindawat P, Apivanich S, Somsakul S,  
400 Sathapatayavongs B, et al. Five-year prospective study of tuberculin skin testing among  
401 new healthcare personnel at a university hospital in Thailand. *J Hosp Infect.*  
402 2012;80(2):173–5.
- 403 22. Agaya J, Nnadi CD, Odhiambo J, Obonyo C, Obiero V, Lipke V, et al. Tuberculosis and  
404 latent tuberculosis infection among healthcare workers in Kisumu, Kenya. *Trop Med*  
405 *Int Heal.* 2015 Dec 1;20(12):1797–804.
- 406 23. He GX, Wang LX, Chai SJ, Klena JD, Cheng SM, Ren YL, et al. Risk factors associated with  
407 tuberculosis infection among health care workers in Inner Mongolia, China. *Int J*  
408 *Tuberc lung Dis Off J Int Union against Tuberc Lung Dis.* 2012 Nov;16(11):1485–91.
- 409 24. de Souza FM, do Prado TN, Pinheiro J dos S, Peres RL, Lacerda TC, Loureiro RB, et al.  
410 Comparison of Interferon- $\gamma$  Release Assay to Two Cut-Off Points of Tuberculin Skin Test  
411 to Detect Latent Mycobacterium tuberculosis Infection in Primary Health Care  
412 Workers. *PLoS One.* 2014 Aug 19;9(8):e102773.
- 413 25. Whitaker JA, Mirtskhulava V, Kipiani M, Harris DA, Tabagari N, Kempker RR, et al.  
414 Prevalence and incidence of latent tuberculosis infection in georgian healthcare  
415 workers. *PLoS One.* 2013;8(3):e58202.
- 416 26. He GX, van denHof S, van der Werf MJ, Wang GJ, Ma SW, Zhao DY, et al. Infection  
417 control and the burden of tuberculosis infection and disease in health care workers in  
418 china: a cross-sectional study. *BMC Infect Dis.* 2010 Oct;10:313.
- 419 27. Neyrolles O, Quintana-Murci L. Sexual Inequality in Tuberculosis. *PLOS Med.* 2009 Dec  
420 22;6(12):e1000199.

- 421 28. Horton KC, MacPherson P, Houben RMGJ, White RG, Corbett EL. Sex Differences in  
422 Tuberculosis Burden and Notifications in Low- and Middle-Income Countries: A  
423 Systematic Review and Meta-analysis. *PLoS Med*. 2016 Sep;13(9):e1002119.
- 424 29. Borroto S, Gámez D, Díaz D, Martínez Y, Ferrer AI, Velásquez Y, et al. Latent tuberculosis  
425 infection among health care workers at a general hospital in Santiago de Cuba. *Int J*  
426 *Tuberc Lung Dis*. 2011;15(11):1510–4.
- 427 30. Nathavitharana RR, Bond P, Dramowski A, Kotze K, Lederer P, Oxley I, et al. Agents of  
428 change: The role of healthcare workers in the prevention of nosocomial and  
429 occupational tuberculosis. *Presse Med*. 2017/02/28. 2017;46(2 Pt 2):e53–62.
- 430 31. Ministry of Health Republic of Indonesia. National Strategic Plan of Tuberculosis  
431 Control 2016 - 2020. 2016.
- 432 32. Chorba T. COVID mRNA vaccines, TST, and IGRA – Follow-up [Internet]. Centers for  
433 Disease Control and Prevention. 2021 [cited 2022 Sep 1]. Available from:  
434 <https://www.cdc.gov/tb/publications/letters/2021/covid-mrna-followUp.html>
- 435 33. Al-Orainey IO. Diagnosis of latent tuberculosis: Can we do better? *Ann Thorac Med*.  
436 2009 Jan;4(1):5–9.
- 437
